# Supplementary material
Source: publisher figshare collection journal article supplement (https://sage.figshare.com/ndownloader/files/13291991)
Supplement: Supplementary file 1 [file 13291991]

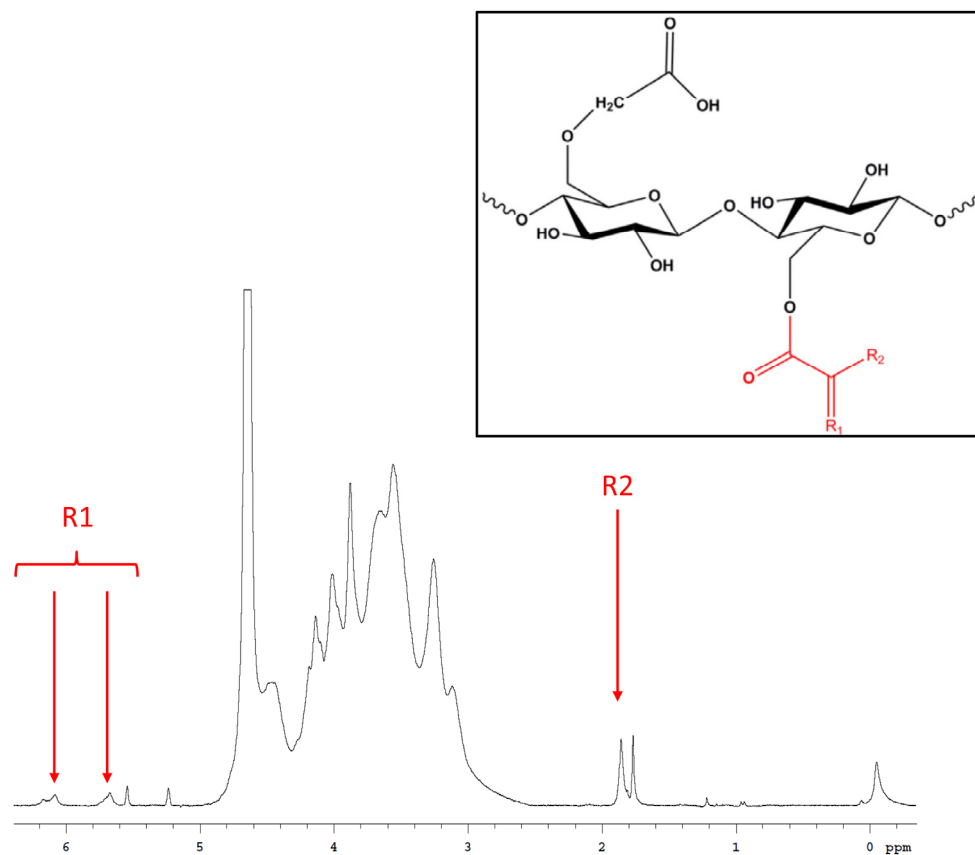

**Figure S1** Representative <sup>1</sup>H-NMR spectrum of CMC modified with methacrylate groups on the polymer backbone. R1 and R2 indicate the methylene and methyl protons of the methacrylate group, respectively.

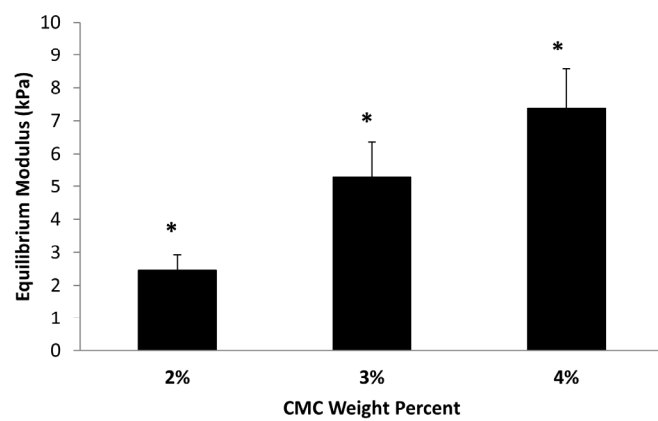

**Figure S2** Equilibrium modulus of crosslinked hydrogels with increasing macromer concentration. \*- Significantly different from other groups.

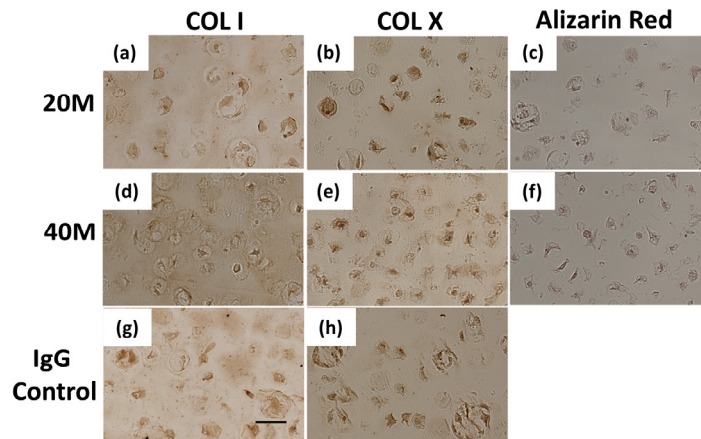

**Figure S3** Staining of fibroblastic (COL I), hypertrophic (COL X) and mineralization (Alizarin Red) tissue markers in 20M and 40M constructs. Scale bar = 50  $\mu$ m

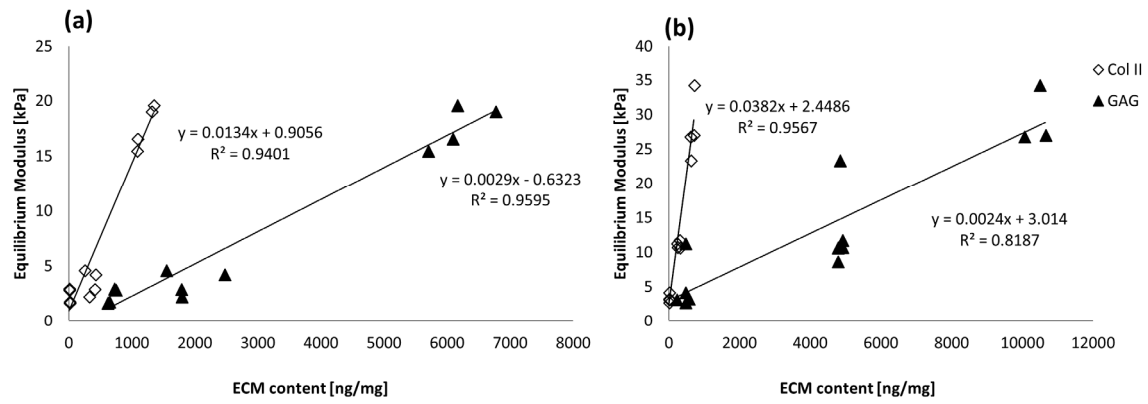

**Figure S4** Scatter plots displaying the correlation between ECM content and the equilibrium modulus of 20M and 40M hydrogels. (a) COL II and GAG content versus  $E_y$  of 20M hydrogels, (b) COL II and GAG content versus  $E_y$  of 40M hydrogels. Line represents the single variable regression line.
